# Supplementary material for: Evolution of treatment paradigms in neovascular age-related macular degeneration: a review of real-world evidence
Source: PubMed Central journal article supplement — Br J Ophthalmol. 2020 Oct 30;105(11):1475–9. doi: 10.1136/bjophthalmol-2020-317434 (PMC8543219; doi:10.1136/bjophthalmol-2020-317434), 2020-10-30
Supplement: bjophthalmol-2020-317434supp001.pdf [file bjophthalmol-2020-317434supp001.pdf]

**Supplementary Table 1. Summary of Outcomes in Real-World Studies of Anti-VEGF Treatment (Not Including Treat-and-Extend Regimens) in Patients With nAMD\***

| Study      | Study design                          | Patient population | Anti-VEGF therapy | Dosing regimen                           | Patients, N | Eyes, n | Outcomes during the previous 12 months                                                     |
|------------|---------------------------------------|--------------------|-------------------|------------------------------------------|-------------|---------|--------------------------------------------------------------------------------------------|
| PrONTO[1]  | Open-label prospective                | nAMD               | Ranibizumab       | PRN, following loading doses             | 40          | –       | At 12 months:<br>Mean injections: 5.6<br>Mean visual acuity change: +9.3 letters (p<0.001) |
| CATT[2]    | Single-blind, randomised, prospective | nAMD               | Ranibizumab       | Every 28 days                            | 284         | –       | At 12 months:<br>Mean injections: 11.7<br>Mean visual acuity change: +8.5 letters          |
|            |                                       |                    |                   | PRN, following first mandatory injection | 285         | –       | At 12 months:<br>Mean injections: 6.9<br>Mean visual acuity change: +6.8 letters           |
|            |                                       |                    | Bevacizumab       | Every 28 days                            | 265         |         | At 12 months:<br>Mean injections: 11.9<br>Mean visual acuity change: +8.0 letters          |
|            |                                       |                    |                   | PRN, following first mandatory injection | 271         |         | At 12 months:<br>Mean injections: 7.7<br>Mean visual acuity change: +5.9 letters           |
| SECURE[3]  | Phase 4, open-label extension study   | nAMD               | Ranibizumab       | PRN                                      | 234         | –       | At 24 months:<br>Mean injections: 6.1<br>Mean visual acuity change: -4.3 letters           |
| HORIZON[4] | Open-label extension study            | nAMD               | Ranibizumab       | PRN (initially treated with ranibizumab) | 600         | –       | At 24 months:<br>Mean injections: 4.4<br>Mean visual acuity change: -7.0 letters           |
|            |                                       |                    |                   | PRN (crossover to ranibizumab)           | 190         | –       | At 24 months:<br>Mean injections: 4.8                                                      |

|                |                                                           |      |             |                              |      |   |                                                                                  |
|----------------|-----------------------------------------------------------|------|-------------|------------------------------|------|---|----------------------------------------------------------------------------------|
|                |                                                           |      |             |                              |      |   | Mean visual acuity change: -2.2 letters                                          |
| TWIN[5]        | Retrospective observational study                         | nAMD | Ranibizumab | PRN, following loading doses | 881  | – | At 12 months:<br>Mean injections: 5.6<br>Mean visual acuity change: +4.3 letters |
| AURA[6]        | Retrospective observational study                         | nAMD | Ranibizumab | PRN, following loading doses | 2227 | – | At 24 months:<br>Mean injections: 7.2<br>Mean visual acuity change: +0.6 letters |
| LUMINOUS[7, 8] | Prospective observational study                           | nAMD | Ranibizumab | PRN, following loading doses | 2701 | – | At 12 months:<br>Mean injections: 5.3<br>Mean visual acuity change: +3.6 letters |
|                |                                                           |      |             |                              | 372  |   | Mean visual acuity change with <3 injections: +2.1 letters                       |
|                |                                                           |      |             |                              | 1499 |   | Mean visual acuity change with 3–6 injections: +3.6 letters                      |
|                |                                                           |      |             |                              | 830  |   | Mean visual acuity change with >6 injections: +4.3 letters                       |
| IRIS[9]        | Retrospective, non-randomised, comparative registry study | nAMD | Ranibizumab | PRN                          | 2749 | – | At 12 months:<br>Mean injections: 6.4<br>Mean visual acuity change: -0.05 logMAR |
|                |                                                           |      | Aflibercept | PRN                          | 4387 | – | At 12 months:<br>Mean injections: 6.2<br>Mean visual acuity change: -0.04 logMAR |
|                |                                                           |      | Bevacizumab | PRN                          | 6723 | – | At 12 months:<br>Mean injections: 5.9<br>Mean visual acuity change: -0.05 logMAR |

|                   |                                                                                          |      |             |                                                               |      |      |                                                                                                                        |
|-------------------|------------------------------------------------------------------------------------------|------|-------------|---------------------------------------------------------------|------|------|------------------------------------------------------------------------------------------------------------------------|
| Talks et al.[10]  | Retrospective review of medical records                                                  | nAMD | Aflibercept | Fixed bimonthly, following loading doses                      | 1682 | 1840 | At 12 months:<br>Mean injections: 7.0<br>Mean visual acuity change: +5.1 letters                                       |
| PERSEUS[11]       | Prospective, non-interventional, non-controlled, multicentre, observational cohort study | nAMD | Aflibercept | Fixed bimonthly (treatment-naïve), following loading doses    | 447  | –    | At 12 months:<br>Mean injections: 7.4<br>Mean visual acuity change: +8.0 letters                                       |
|                   |                                                                                          |      |             | PRN (treatment-naïve)                                         |      |      | At 12 months:<br>Mean injections: 5.1<br>Mean visual acuity change: +4.0 letters                                       |
|                   |                                                                                          |      |             | Fixed bimonthly (previously treated), following loading doses | 355  | –    | At 12 months:<br>Mean injections: 7.5<br>Mean visual acuity change: +3.1 letters                                       |
|                   |                                                                                          |      |             | PRN (previously treated)                                      |      |      | At 12 months:<br>Mean injections: 5.3<br>Mean visual acuity change: -1.1 letters                                       |
| Lee et al.[12]    | Retrospective review of medical records                                                  | nAMD | Aflibercept | Fixed bimonthly, following loading doses                      | –    | 942  | At 12 months:<br>Mean injections: 7.0<br>Mean visual acuity change: +6.1 letters (p<0.001)                             |
|                   |                                                                                          |      | Ranibizumab | PRN                                                           | –    | 942  | At 12 months:<br>Mean injections: 5.8<br>Mean visual acuity change: +1.6 letters                                       |
| Airody et al.[13] | Single-centre cohort                                                                     | nAMD | Ranibizumab | PRN, following loading doses                                  | 68   | –    | At 60 months:<br>Median injections: 6, 4, 4, 4, 7 in Year 1–5, respectively<br>Mean visual acuity change: +5.7 letters |

|                       |                                                             |                                                                                                   |             |                                                                   |      |      |                                                                                                                                                          |
|-----------------------|-------------------------------------------------------------|---------------------------------------------------------------------------------------------------|-------------|-------------------------------------------------------------------|------|------|----------------------------------------------------------------------------------------------------------------------------------------------------------|
| Almuhtaseb et al.[14] | Retrospective review of medical records                     | nAMD                                                                                              | Aflibercept | Fixed bimonthly, following loading doses                          | 223  | 255  | At 12 months:<br>Mean injections: 7.0<br>Mean visual acuity change: -0.16 logMAR                                                                         |
| Almuhtaseb et al.[15] | Retrospective review of medical records                     | nAMD                                                                                              | Aflibercept | Fixed bimonthly in Year 1, PRN in Year 2, following loading doses | 1083 | 1180 | At 12 months:<br>Mean visual acuity change: +5.0 letters<br><br>From 12 to 24 months:<br>Mean injections: 3.7<br>Mean visual acuity change: +2.8 letters |
| Arias et al.[16]      | Prospective, non-comparative, consecutive case series study | nAMD                                                                                              | Ranibizumab | PRN, following loading doses                                      | 88   | 90   | At 12 months:<br>Mean injections: 4.4<br>Mean visual acuity change: +7 letters                                                                           |
| Barthelmes et al.[17] | Registry study                                              | Exudative nAMD switching treatment after ≥12 months (mean 39.8 months) treatment with ranibizumab | Aflibercept | PRN, following loading doses                                      | –    | 384  | At 12 months after switch:<br>Mean injections: 3.2<br>Mean visual acuity change: -0.1 letters                                                            |
| Berg et al.[18]       | Retrospective review of medical records                     | nAMD                                                                                              | Bevacizumab | PRN, following monthly dosing until there were                    | 40   |      | At Year 8:<br>Mean injections: 5.4<br>Mean visual acuity change: -2.1 letters                                                                            |

|                    |                                         |                                                              |                                         |                              |      |      |                                                                                                  |
|--------------------|-----------------------------------------|--------------------------------------------------------------|-----------------------------------------|------------------------------|------|------|--------------------------------------------------------------------------------------------------|
|                    |                                         |                                                              |                                         | no signs of active nAMD      |      |      |                                                                                                  |
| Biarnés et al.[19] | Retrospective, consecutive case series  | nAMD                                                         | Ranibizumab                             | PRN                          | 71   | 67   | At 12 months:<br>Mean injections: 3.5<br>Mean visual acuity change: +1.3 letters                 |
| Böhni et al.[20]   | Retrospective review of medical records | nAMD                                                         | Ranibizumab                             | PRN, following loading doses | 15   | 16   | At 12 months:<br>Mean injections: 8.3<br>Mean visual acuity change: +15.0 letters                |
|                    |                                         |                                                              | Aflibercept                             | PRN, following loading doses | 9    | 11   | At 12 months:<br>Mean injections: 8.5<br>Mean visual acuity change: +5.6 letters                 |
| Braimah et al.[21] | Retrospective review of medical records | Patients with nAMD switched from bevacizumab and ranibizumab | Aflibercept                             | PRN                          | 14   | 16   | At 12 months:<br>Mean injections: 5.9<br>Mean visual acuity change: No change                    |
| UNCOVER[22]        | Retrospective cohort study              | nAMD                                                         | Ranibizumab                             | –                            | 3241 | 3725 | At mean 22.3 months:<br>Mean injections: 4.2 per year<br>Mean visual acuity change: -0.7 letters |
| Elwes et al.[23]   | Retrospective review of medical records | nAMD                                                         | Aflibercept, switching from ranibizumab | PRN, following loading doses | 182  | 207  | At 85 weeks:<br>Mean injections: 10<br>Mean visual acuity change: -8.9 letters                   |
|                    |                                         |                                                              |                                         |                              |      |      |                                                                                                  |

|                       |                                         |      |                       |                              |      |     |                                                                                                                                                                      |
|-----------------------|-----------------------------------------|------|-----------------------|------------------------------|------|-----|----------------------------------------------------------------------------------------------------------------------------------------------------------------------|
| WAVE[24]              | Prospective observational study         | nAMD | Ranibizumab           | PRN, following loading doses | 2587 | –   | At 12 months:<br>Mean injections: 4.3<br>Mean visual acuity change: +0.02 logMAR                                                                                     |
| Gabai et al.[25]      | Retrospective review of patient records | nAMD | Ranibizumab           | PRN, following loading doses | 92   | 100 | At 12 months:<br>Mean injections: 4.8<br>Mean visual acuity change: -2.0 letters                                                                                     |
| Garweg et al.[26]     | Retrospective review of medical records | nAMD | Any anti-VEGF therapy | PRN, following loading doses | 104  | 104 | At Years 3–10:<br>Mean injections: 2.8 annually<br>Mean visual acuity change: -7.3 to -11.9 letters                                                                  |
| Gerding et al.[27]    | Retrospective review of medical records | nAMD | Ranibizumab           | PRN, following loading doses | –    | 104 | At 12 months:<br>Mean injections: 5.8<br>Mean visual acuity change: +5.0 letters                                                                                     |
| Giacomelli et al.[28] | Retrospective review of medical records | nAMD | Ranibizumab           | PRN, following loading doses | 31   | –   | At 12 months:<br>Mean injections: 5.1<br>Mean visual acuity change: +0.14 logMAR<br>At 24 months:<br>Mean injections: 7.6<br>Mean visual acuity change: +0.25 logMAR |

|                                    |                                         |               |             |                              |     |     |                                                                                                                                                                       |
|------------------------------------|-----------------------------------------|---------------|-------------|------------------------------|-----|-----|-----------------------------------------------------------------------------------------------------------------------------------------------------------------------|
| Giannou et al.[29]                 | Prospective cohort study                | nAMD          | Ranibizumab | Observe-and-plan             | 104 | 115 | At 12 months:<br>Mean injections: 7.8<br>Mean visual acuity change: +9.7 letters<br>At 24 months:<br>Mean injections: 13.6<br>Mean visual acuity change: +9.2 letters |
| Fight Retinal Blindness! Study[30] | Prospective observational study         | nAMD          | Ranibizumab | –                            | –   | 197 | At 12 months:<br>Mean injections: 8.1<br>Mean visual acuity change: +2.9 letters                                                                                      |
|                                    |                                         |               | Aflibercept | –                            | –   | 197 | At 12 months:<br>Mean injections: 8.0<br>Mean visual acuity change: +5.4 letters                                                                                      |
| Heimes et al.[31]                  | Prospective observational study         | nAMD          | Ranibizumab | PRN, following loading doses | –   | 152 | At 12 months:<br>Mean injections: 5<br>Mean visual acuity change: 0 logMAR                                                                                            |
| Kang and Roh[32]                   | Retrospective review of medical records | nAMD          | Ranibizumab | PRN (without a loading dose) | 41  | 41  | At 12 months:<br>Mean injections: 4.1<br>Mean visual acuity change: -0.078 logMAR (p<0.05)                                                                            |
| Lala et al.[33]                    | Retrospective review of medical records | Exudative AMD | Ranibizumab | PRN, following loading doses | 284 | 284 | At 12 months:<br>Mean injections: 7.1<br>Mean visual acuity change: +7.5 letters                                                                                      |
|                                    |                                         |               |             |                              | 208 | 208 | At 24 months:                                                                                                                                                         |

|                      |                                                         |                                                                                                      |             |                              |     |      |                                                                                                                                                         |
|----------------------|---------------------------------------------------------|------------------------------------------------------------------------------------------------------|-------------|------------------------------|-----|------|---------------------------------------------------------------------------------------------------------------------------------------------------------|
|                      |                                                         |                                                                                                      |             |                              | 152 | 152  | Mean injections: 5.0<br>Mean visual acuity change: +9.1 letters<br><br>At 36 months:<br>Mean injections: 5.2<br>Mean visual acuity change: +8.3 letters |
| Liew et al.[34]      | Retrospective review of medical records                 | nAMD                                                                                                 | Ranibizumab | PRN, following loading doses | –   | 5811 | At 12 months:<br>Median injections: 6.0<br>Mean visual acuity change: +2.5 letters                                                                      |
| Lotery et al.[35]    | Retrospective, comparative, non-randomised cohort study | nAMD                                                                                                 | Ranibizumab | Regimen not defined          | –   | 3350 | At 12 months:<br>Median injections: 6.7<br>Mean visual acuity change: -0.30 letters                                                                     |
|                      |                                                         |                                                                                                      | Aflibercept | Regimen not defined          | –   | 4300 | At 12 months:<br>Median injections: 7.0<br>Mean visual acuity change: -0.19 letters                                                                     |
| Marques et al.[36]   | Retrospective review of medical records                 | nAMD                                                                                                 | Ranibizumab | PRN                          | 77  | 84   | At 36 months:<br>Mean injections: 8.6<br>Mean visual acuity change: +0.19 letters                                                                       |
| Muftuoglu et al.[37] | Prospective interventional study                        | Patients with nAMD who failed treatment with ranibizumab or bevacizumab or aflibercept every 8 weeks | Aflibercept | PRN                          | 39  | 43   | At 12 months:<br>Mean injections: 8<br>Mean visual acuity change: +0.02 logMAR                                                                          |
| Muniraju et al.[38]  | Retrospective review of medical records                 | nAMD                                                                                                 | Ranibizumab | PRN, following loading doses | 156 | 174  | At 12 months:<br>Mean injections: 4.8                                                                                                                   |



|                   |                                         |      |             |                              |    |    |                                                                                                                                                                                                                                                                                                                                                                                                                                                                             |
|-------------------|-----------------------------------------|------|-------------|------------------------------|----|----|-----------------------------------------------------------------------------------------------------------------------------------------------------------------------------------------------------------------------------------------------------------------------------------------------------------------------------------------------------------------------------------------------------------------------------------------------------------------------------|
|                   |                                         |      |             |                              |    |    | <p>Mean visual acuity change: +3.0 letters (p&lt;0.05)</p> <p>At 24 months:<br/> Mean injections: 2.9<br/> Mean visual acuity change: +2.2 letters</p> <p>At 36 months:<br/> Mean injections: 2.4<br/> Mean visual acuity change: +0.9 letters</p>                                                                                                                                                                                                                          |
| Ozkaya et al.[39] | Retrospective review of medical records | nAMD | Ranibizumab | PRN, following loading doses | 37 | 44 | <p>At 12 months:<br/> Mean injections: 3.9<br/> Mean visual acuity change: -0.02 logMAR</p> <p>At 24 months:<br/> Mean injections: 2.6<br/> Mean visual acuity change: +0.09 logMAR</p> <p>At 36 months:<br/> Mean injections: 2.1<br/> Mean visual acuity change: +0.23 logMAR</p> <p>At 48 months:<br/> Mean injections: 2.0<br/> Mean visual acuity change: +0.27 logMAR</p> <p>At 60 months:<br/> Mean injections: 2.3<br/> Mean visual acuity change: +0.29 logMAR</p> |

|                      |                                         |               |                       |                                                                     |     |     |                                                                                                                                                                                          |
|----------------------|-----------------------------------------|---------------|-----------------------|---------------------------------------------------------------------|-----|-----|------------------------------------------------------------------------------------------------------------------------------------------------------------------------------------------|
| Parvin et al.[40]    | Prospective non-comparative case series | nAMD          | Aflibercept           | Observe-and-plan, following loading doses                           | 102 | 112 | At 12 months:<br>Mean injections: 8.7<br>Mean visual acuity change: +8.0 letters (p<0.001)<br>At 24 months:<br>Mean injections: 6.3<br>Mean visual acuity change: +6.2 letters (p<0.001) |
| Peden et al.[41]     | Retrospective review of medical records | Exudative AMD | Any anti-VEGF therapy | Continuous fixed dosing every 4–8 weeks (mean 10.5 injections/year) | 109 | –   | At 60 months:<br>Mean visual acuity change: +14.0 letters (p<0.001)                                                                                                                      |
|                      |                                         |               |                       |                                                                     | 75  | –   | At 72 months:<br>Mean visual acuity change: +12.2 letters (p<0.001)                                                                                                                      |
|                      |                                         |               |                       |                                                                     | 44  | –   | At 84 months:<br>Mean visual acuity change: +12.1 letters (p<0.001)                                                                                                                      |
| Rasmussen et al.[42] | Retrospective review of medical records | nAMD          | Ranibizumab           | PRN, following loading doses                                        | 559 | 616 | At 12 months:<br>Mean injections: 6.9<br>Mean visual acuity change: +0.08 Snellen (p<0.001)                                                                                              |
|                      |                                         |               | Aflibercept           |                                                                     | 468 | 527 | At 12 months:<br>Mean injections: 5.9<br>Mean visual acuity change: +0.08 Snellen (p<0.001)                                                                                              |

|                      |                                         |                                |             |                                                 |     |     |                                                                                                                                                                                                                                                                        |
|----------------------|-----------------------------------------|--------------------------------|-------------|-------------------------------------------------|-----|-----|------------------------------------------------------------------------------------------------------------------------------------------------------------------------------------------------------------------------------------------------------------------------|
| Rasmussen et al.[43] | Retrospective review of medical records | nAMD                           | Ranibizumab | PRN, following loading doses                    | 192 | 192 | At 12 months:<br>Mean injections: 5.2<br>Mean visual acuity change: +0.05 Snellen ( $p<0.001$ )<br>At 24 months:<br>Mean injections: 5.0<br>At 36 months:<br>Mean injections: 5.5<br>At 48 months:<br>Mean injections: 6.4<br>Mean visual acuity change: +0.02 Snellen |
| Ricci et al.[44]     | Retrospective review of medical records | nAMD switched from ranibizumab | Aflibercept | PRN, following loading doses                    | –   | 36  | At 12 months:<br>Mean injections: 3.5<br>Mean visual acuity change: -3 letters                                                                                                                                                                                         |
|                      |                                         |                                |             | Fixed dosing bimonthly, following loading doses | –   | 36  | At 12 months:<br>Mean injections: 7.0<br>Mean visual acuity change: +3 letters ( $p<0.01$ ; $p=0.01$ versus PRN)                                                                                                                                                       |
| Saleh et al.[45]     | Prospective cohort study                | Exudative AMD                  | Aflibercept | PRN, following loading doses                    | 60  | 66  | At 24 months:<br>Mean injections: 5/year<br>Mean visual acuity change: +1.0 letters                                                                                                                                                                                    |
| LUEUR[5]             | Prospective cohort study                | nAMD (total study population)  | Ranibizumab | PRN, following loading doses                    | 517 | 592 | At 12 months:<br>Mean injections: 2.9<br>Mean visual acuity change: +0.1 letters<br>At 24 months:                                                                                                                                                                      |

|                        |                                                        |                                      |                       |                                   |     |     |                                                                                                                                                                          |
|------------------------|--------------------------------------------------------|--------------------------------------|-----------------------|-----------------------------------|-----|-----|--------------------------------------------------------------------------------------------------------------------------------------------------------------------------|
|                        |                                                        |                                      |                       |                                   |     |     | Mean injections: 2.2<br>Mean visual acuity change: -2.0 letters                                                                                                          |
|                        |                                                        | nAMD<br>(treatment-naïve population) |                       | PRN, following loading doses      | –   | 90  | At 12 months:<br>Mean injections: 3.4<br>Mean visual acuity change: +2.1 letters<br><br>At 24 months:<br>Mean injections: 1.6<br>Mean visual acuity change: -0.2 letters |
| Westborg et al.[46]    | Retrospective registry study                           | nAMD                                 | Any anti-VEGF therapy | Regimen not defined               | –   | –   | At 84 months:<br>Mean injections: 3/year<br>Mean visual acuity change: -1.0 letters                                                                                      |
| PACORES[47, 48]        | Retrospective review of medical records                | nAMD                                 | Bevacizumab           | PRN                               | 63  | 63  | At 12 months:<br>Mean injections: 3.5<br>Mean visual acuity change: -0.2 logMAR (p<0.001)                                                                                |
|                        |                                                        |                                      |                       |                                   | 247 | 292 | At 60 months:<br>Mean injections: 10.9 over 5 years<br>Mean visual acuity change: +0.2 logMAR (p<0.001)                                                                  |
| Axer-Siegel et al.[49] | Retrospective review of medical records                | Exudative AMD                        | Bevacizumab           | PRN, following loading doses      | 130 | 150 | At 20.2 months:<br>Mean injections: 11.3<br>Mean visual acuity change: No change                                                                                         |
| Bashshur et al.[50]    | Prospective, open-label, non-randomised clinical study | CNV resulting from nAMD              | Bevacizumab           | PRN, following loading doses [51] | 51  | 51  | At 24 months:<br>Mean injections in Year 2: 1.5<br>Mean visual acuity change: +8.6 letters (p=0.001)                                                                     |
| Bellerive et al.[52]   |                                                        | nAMD                                 | Bevacizumab           | PRN, following loading doses      | –   | 142 | At 12 months:<br>Mean injections: 4.8                                                                                                                                    |

|                    |                                         |                                                                     |                                                                                                |                              |     |     |                                                                                                                                                                                                                                                                                                                   |
|--------------------|-----------------------------------------|---------------------------------------------------------------------|------------------------------------------------------------------------------------------------|------------------------------|-----|-----|-------------------------------------------------------------------------------------------------------------------------------------------------------------------------------------------------------------------------------------------------------------------------------------------------------------------|
|                    | Retrospective review of medical records |                                                                     | Ranibizumab                                                                                    | PRN, following loading doses | –   | 50  | Mean visual acuity change: -0.03 logMAR<br>At 12 months:<br>Mean injections: 4.9<br>Mean visual acuity change: -0.06 logMAR                                                                                                                                                                                       |
| Beykin et al.[53]  | Retrospective review of medical records | CNV resulting from nAMD                                             | Bevacizumab (with second line ranibizumab therapy for patients experiencing treatment failure) | PRN, following loading doses | 128 | 142 | Mean injections per year: 5.4<br>At 12 months:<br>Mean visual acuity change: +8.8 letters (p<0.05)<br>At 24 months:<br>Mean visual acuity change: +7.8 letters (p<0.05)<br>At 36 months:<br>Mean visual acuity change: -1.2 letters<br>At ≥48 months (mean 60 months):<br>Mean visual acuity change: -1.7 letters |
| Calvo et al.[54]   | Retrospective review of medical records | nAMD                                                                | Ranibizumab                                                                                    | PRN, following loading doses | 51  | 51  | Mean injections over 3 years: 6.98<br>At 12 months:<br>Mean visual acuity change: -0.17 logMAR                                                                                                                                                                                                                    |
| Chang et al.[55]   | Retrospective review of medical records | Exudative AMD in eyes with initial visual acuity of 20/25 or better | Ranibizumab or bevacizumab                                                                     | PRN, following loading doses | 18  | 18  | At 12 months:<br>Mean injections: 4.4<br>Mean visual acuity change: +0.08 logMAR (p=0.009)                                                                                                                                                                                                                        |
| LUMIERE[56]        | Retrospective review of medical records | nAMD                                                                | Ranibizumab                                                                                    | PRN, following loading doses | 551 | –   | At 12 months:<br>Mean injections: 5.1<br>Mean visual acuity change: +3.2 letters                                                                                                                                                                                                                                  |
| De Bats et al.[57] | Retrospective case-control study        | nAMD                                                                | Bevacizumab                                                                                    | PRN, following loading doses | 30  | –   | At 12 months:<br>Mean injections: 4.8<br>Mean visual acuity change: -0.23 logMAR                                                                                                                                                                                                                                  |

|                          |                                                               |                                |             |                                                                        |     |     |                                                                                                                                                                                                                                                          |
|--------------------------|---------------------------------------------------------------|--------------------------------|-------------|------------------------------------------------------------------------|-----|-----|----------------------------------------------------------------------------------------------------------------------------------------------------------------------------------------------------------------------------------------------------------|
|                          |                                                               |                                | Ranibizumab |                                                                        | 28  | –   | At 12 months:<br>Mean injections: 5.8<br>Mean visual acuity change: -0.01 logMAR                                                                                                                                                                         |
| Eleftheriadou et al.[58] | Retrospective case series                                     | nAMD (treatment-naïve)         | Aflibercept | Fixed dosing in Year 1, following loading doses, then treat-and-extend | 139 | 148 | At 12 months:<br>Mean injections: 7.2<br>Mean visual acuity change: +5.9 letters<br>At 24 months:<br>Mean injections: 12<br>Mean visual acuity change: +6.4 letters<br>At 36 months:<br>Mean injections: 15.9<br>Mean visual acuity change: +6.6 letters |
| Gupta et al.[59]         | Retrospective review of medical records                       | nAMD and CND (treatment naïve) | Ranibizumab | PRN, following loading doses                                           | 47  | 47  | At 12 months:<br>Mean injections: 6.0<br>Mean visual acuity change: +4.4 letters                                                                                                                                                                         |
|                          |                                                               |                                |             | PRN, following one injection at baseline                               | 31  | 31  | At 12 months:<br>Mean injections: 4.5<br>Mean visual acuity change: +4.0 letters                                                                                                                                                                         |
| Hjelmqvist et al.[60]    | Open-label, prospective and retrospective observational study | Wet AMD                        | Ranibizumab | PRN, following loading doses                                           | 370 | -   | At 12 months:<br>Mean injections: 7.7<br>Mean visual acuity change: +1.0 letter                                                                                                                                                                          |
| HELIX[61]                | Retrospective review of medical records                       | nAMD                           | Ranibizumab | PRN, following loading doses                                           | 69  | 88  | At 12 months:<br>Mean injections: 5.2<br>Mean visual acuity change: +3.7 letters<br>At 24 months:<br>Mean injections in Year 2: 3.2<br>Mean visual acuity change: +2.4 letters                                                                           |

|                     |                                         |                                |             |                                                               |     |     |                                                                                                                                                                                                                                                                                                                                                                                                                         |
|---------------------|-----------------------------------------|--------------------------------|-------------|---------------------------------------------------------------|-----|-----|-------------------------------------------------------------------------------------------------------------------------------------------------------------------------------------------------------------------------------------------------------------------------------------------------------------------------------------------------------------------------------------------------------------------------|
|                     |                                         |                                |             |                                                               |     |     | <p>At 36 months:<br/> Mean injections in Year 3: 3.1<br/> Mean visual acuity change: +1.1 letters</p> <p>At 48 months:<br/> Mean injections in Year 4: 3.2<br/> Mean visual acuity change: +2.6 letters</p> <p>At 60 months:<br/> Mean injections in Year 5: 3.1<br/> Mean visual acuity change: -1.1 letters</p> <p>At 72 months:<br/> Mean injections in Year 6: 2.5<br/> Mean visual acuity change: -1.6 letters</p> |
| Krüger et al.[62]   | Retrospective review of medical records | nAMD                           | Ranibizumab | PRN (according to Danish Guidelines), following loading doses | 855 | 855 | <p>At 48 months (mean follow-up):<br/> Mean injections: 8.7 over 48 months<br/> Mean visual acuity change: -2.7 letters</p>                                                                                                                                                                                                                                                                                             |
| Lalwani et al.[63]  | Open-label prospective study            | nAMD                           | Ranibizumab | PRN, following loading doses                                  | 40  | -   | <p>At 24 months:<br/> Mean injections: 9.9 over 24 months<br/> Mean visual acuity change: +11.1 letters<br/> (p&lt;0.001)</p>                                                                                                                                                                                                                                                                                           |
| Mantel et al.[64]   | Open-label prospective study            | nAMD and CNV (treatment-naïve) | Ranibizumab | Observe-and-plan, following loading doses                     | 104 | 115 | <p>At 12 months:<br/> Mean injections: 7.8 injections<br/> Mean visual acuity change: +8.7 letters</p>                                                                                                                                                                                                                                                                                                                  |
| Mekjavic et al.[65] | Retrospective review of medical records | nAMD and CNV                   | Ranibizumab | PRN, following loading doses                                  | 147 | 149 | <p>At 12 months:<br/> Mean injections: 5.1 injections<br/> Mean visual acuity change: +6 letters<br/> (p&lt;0.0001)</p>                                                                                                                                                                                                                                                                                                 |

|                              |                                              |                                                                                |             |                             |     |     |                                                                                                                                                                      |
|------------------------------|----------------------------------------------|--------------------------------------------------------------------------------|-------------|-----------------------------|-----|-----|----------------------------------------------------------------------------------------------------------------------------------------------------------------------|
| Messenger et al.[66]         | Retrospective review of medical records      | nAMD previously treated with bevacizumab or ranibizumab for at least 12 months | Aflibercept | PRN, following loading dose | 109 | 109 | At 12 months:<br>Mean injections: 7.2 injections<br>Mean visual acuity change: No change                                                                             |
| Muether et al.[67]           | Open-label prospective study                 | nAMD                                                                           | Ranibizumab | PRN, following loading dose | 89  | –   | At 12 months:<br>Mean injections: 6.9 injections<br>Mean visual acuity change: -0.66 letters                                                                         |
| Ohnaka et al.[68]            | Retrospective review of medical records      | nAMD                                                                           | Aflibercept | Modified treat-and-extend   | 36  | 36  | At 12 months:<br>Mean injections: 4.5 injections<br>Mean visual acuity change: -0.08 logMAR (p<0.01)                                                                 |
| HELIOS (Belgium)[69]         | Prospective, observational, open-label study | Wet AMD                                                                        | Ranibizumab | PRN                         | 267 | 309 | At 12 months:<br>Mean injections: 5.0<br>Mean visual acuity change: +1.6 letters<br>At 24 months:<br>Mean injections: 7.6<br>Mean visual acuity change: -2.4 letters |
| HELIOS (The Netherlands)[70] |                                              |                                                                                |             |                             | 243 | –   | At 12 months:<br>Mean injections: 5.5<br>Mean visual acuity change: +4.4 letters<br>At 24 months:<br>Mean injections: 7.8<br>Mean visual acuity change: +1.0 letters |
| Suzuki et al.[71]            | Retrospective review of medical records      | nAMD and CNV                                                                   | Bevacizumab | PRN                         | 47  |     | At 12 months:<br>Mean injections: 3.4                                                                                                                                |



|                            |                                              |                              |             |                                                              |      |                                   |                                                                                                                                     |
|----------------------------|----------------------------------------------|------------------------------|-------------|--------------------------------------------------------------|------|-----------------------------------|-------------------------------------------------------------------------------------------------------------------------------------|
|                            |                                              |                              |             |                                                              |      |                                   | Mean visual acuity change: +0.04 logMAR                                                                                             |
| Warwick et al.[72]         | Retrospective review of medical records      | nAMD (Treatment-naïve)       | Aflibercept | 3 monthly loading doses followed by injection every 2 months | 51   | 58                                | At 12 months:<br>Mean injections: 7.1<br>Mean visual acuity change: +4.7 letters (p<0.001)                                          |
|                            |                                              | nAMD (Treatment-experienced) |             |                                                              | 88   | 107                               | At 12 months:<br>Mean injections: 7.5<br>Mean visual acuity change: +3.3 letters (p<0.01)                                           |
| RAINBOW[73]                | Observational, retrospective and prospective | Wet AMD                      | Aflibercept | Fixed (bimonthly)                                            | 012  |                                   | At 12 months:<br>Mean injections: 7.2<br>Mean visual acuity change: +7.1 letters (p<0.001; p<0.001 versus PRN without loading dose) |
|                            |                                              |                              |             | PRN (with loading dose)                                      | 266  |                                   | At 12 months:<br>Mean injections: 6.1<br>Mean visual acuity change: +5.6 letters (p<0.001; p=0.003 versus PRN without loading dose) |
|                            |                                              |                              |             | PRN (without loading dose)                                   | 60   |                                   | At 12 months:<br>Mean injections: 5.2<br>Mean visual acuity change: +5.0 letters (p<0.001)                                          |
| Lovestam Adrian et al.[74] | Observational, retrospective                 | nAMD                         | Aflibercept | PRN, following loading dose                                  | 2312 | 12 months: 2478<br>24 months: 831 | At 12 months:<br>Mean visual acuity change from baseline overall: +3.2 letters<br>At 24 months:                                     |

|                        |                                          |               |                                         |                                                              |     |                         |                                                                                                                                                                    |
|------------------------|------------------------------------------|---------------|-----------------------------------------|--------------------------------------------------------------|-----|-------------------------|--------------------------------------------------------------------------------------------------------------------------------------------------------------------|
|                        |                                          |               |                                         |                                                              |     |                         | Mean visual acuity change from baseline overall: +3.8                                                                                                              |
| Barakat et al.[75]     | Observational, retrospective             | nAMD          | Aflibercept                             | Loading phase, PRN (Weeks 12 to 32), then treat-and-extend   | 38  | 48                      | At 12 months:<br>Mean injections: 6<br>Mean visual acuity change: +6.0 letters<br>At 24 months:<br>Mean injections: 3.2<br>Mean visual acuity change: +5.2 letters |
| Ono et al.[76]         | Interventional, case series, prospective | Exudative AMD | Aflibercept                             | 3 monthly loading doses followed by injection every 2 months | 48  | 48                      | At 12 months:<br>Total injections: 7<br>Mean overall visual acuity change:<br>LogMAR -0.13 (p=0.008; vs baseline)                                                  |
| Chatziralli et al.[77] | Observational, retrospective             | nAMD          | Aflibercept                             | Bimonthly dosing in Year 1, following loading dose           | -   | 2506 (<90 years of age) | At 12 months:<br>Mean visual acuity: +4.6 letters<br>At 24 months:<br>Mean visual acuity: +2.1                                                                     |
| Brand et al.[78]       | Observational, retrospective             | nAMD          | Ranibizumab monotherapy                 | 3 month loading doses then PRN                               | 50  | -                       | At 12 months:<br>Mean injections: 5.6<br>Mean visual acuity change: -0.3 letters                                                                                   |
|                        |                                          |               | Ranibizumab + stereotactic radiotherapy | Stereotactic therapy during 3-month loading dose then PRN    | 132 | -                       | At 12 months:<br>Mean injections: 4.5<br>Mean visual acuity change: +3.0 letters                                                                                   |

\*All visual acuity changes are relative to baseline. Mean injections are the number of injections in the preceding 12-month period.  
p-values are versus baseline unless otherwise stated.

AMD, age-related macular degeneration; CNV, choroidal neovascularisation; logMAR, log of the Minimum Angle of Resolution; nAMD, neovascular AMD; PRN, pro re nata; VEGF, vascular endothelial growth factor.

**Supplementary Table 2. Summary of Outcomes in Real-World Studies of Anti-VEGF Treatment (Including Treat-and-Extend Regimens) in Patients With nAMD\***

| Study                              | Study design                                                                    | Patient population | Anti-VEGF therapy         | Dosing regimen                                                            | Patients, N | Eyes, n | Outcomes during the previous 12 months                                                                                                                       |
|------------------------------------|---------------------------------------------------------------------------------|--------------------|---------------------------|---------------------------------------------------------------------------|-------------|---------|--------------------------------------------------------------------------------------------------------------------------------------------------------------|
| Oubraham et al.[79]                | Retrospective consecutive case series                                           | Exudative AMD      | Ranibizumab               | PRN, following loading doses                                              | 52          | –       | At 12 months:<br>Mean injections: 5.2<br>Mean visual acuity change: +2.3 letters                                                                             |
|                                    |                                                                                 |                    |                           | Treat-and-extend, following loading doses                                 | 38          | –       | At 12 months:<br>Mean injections: 7.8<br>Mean visual acuity change: +10.8 letters (p<0.05)                                                                   |
| Hatz and Prünke[80]                | Retrospective, consecutive, comparative case series of treatment-naïve patients | nAMD               | Ranibizumab               | PRN (mean duration: 17 months), following loading doses                   | 134         | 146     | Mean BCVA ( $\pm$ SD) increased from 0.39 $\pm$ 0.23 to 0.55 $\pm$ 0.22 (p<0.001) during the PRN loading regimen, then declined to 0.49 $\pm$ 0.22 (p<0.001) |
|                                    |                                                                                 |                    |                           | Treat-and-extend                                                          |             |         | BCVA improved from 0.49 $\pm$ 0.22 to 0.55 $\pm$ 0.23 and 0.56 $\pm$ 0.24 by 6 and 12 months, respectively (p<0.001)                                         |
| Fight Retinal Blindness! Study[81] | Observational registry                                                          | nAMD               | Predominantly ranibizumab | Treat-and-extend, following loading doses until CNV activity had resolved | 1101        | 1198    | At 24 months:<br>Mean injections: 13.0 (7.5 in Year 1 and 5.5 in Year 2)<br>Mean visual acuity change: +5.3 letters                                          |

|                                    |                                         |                                                                         |                            |                                           |     |     |                                                                                                                                                                      |
|------------------------------------|-----------------------------------------|-------------------------------------------------------------------------|----------------------------|-------------------------------------------|-----|-----|----------------------------------------------------------------------------------------------------------------------------------------------------------------------|
| Fight Retinal Blindness! Study[82] | Observational registry                  | nAMD                                                                    | Aflibercept                | Treat-and-extend, following loading doses | 123 | 136 | At 24 months:<br>Mean injections: 13.6 (7.8 in Year 1 and 5.7 in Year 2)<br>Mean visual acuity change: +6.0 letters                                                  |
| Abedi et al.[83]                   | Prospective cohort study                | nAMD                                                                    | Ranibizumab or bevacizumab | Treat-and-extend, following loading doses | 120 | –   | At 12 months:<br>Mean injections: 8.6<br>Mean visual acuity change: +9.5 letters<br>At 24 months:<br>Mean injections: 5.6<br>Mean visual acuity change: +8.0 letters |
| Castro-Navarro et al.[84]          | Retrospective review of medical records | Exudative nAMD                                                          | Aflibercept                | Treat-and-extend, following loading doses | 30  | 30  | At 12 months:<br>Mean injections: 7.4–8.7<br>Mean visual acuity change: -0.23 logMAR                                                                                 |
| Castro-Navarro et al.[85]          | Retrospective review of medical records | Exudative nAMD with secondary CNV and retinal angiomatous proliferation | Aflibercept                | Treat-and-extend, following loading doses | –   | 37  | At 12 months:<br>Mean injections: 7.3–8.0<br>Mean visual acuity change: -0.20 logMAR                                                                                 |
| Chen et al.[86]                    | Retrospective review of medical records | nAMD                                                                    | Ranibizumab                | Treat-and-extend, following loading doses | 79  | –   | At 12 months:<br>Mean injections: 8.6<br>Mean visual acuity change: +7.9 letters                                                                                     |
| Garweg et al.[87]                  | Retrospective review of medical records | nAMD                                                                    | Ranibizumab                | PRN, following loading doses              | 61  | 68  | At 12 months:<br>Mean injections: 5.5<br>Mean visual acuity change: +0.66 letters<br>At 24 months:                                                                   |

|                                 |                                                                |                                                 |             |                                           |    |    |                                                                                                                                                                                                          |
|---------------------------------|----------------------------------------------------------------|-------------------------------------------------|-------------|-------------------------------------------|----|----|----------------------------------------------------------------------------------------------------------------------------------------------------------------------------------------------------------|
|                                 |                                                                |                                                 |             |                                           |    |    | Mean injections in Year 2: 1.9<br>Mean visual acuity change: -3.67                                                                                                                                       |
|                                 |                                                                |                                                 |             | Treat-and-extend, following loading doses | 35 | 39 | At 12 months:<br>Mean injections: 6.8<br>Mean visual acuity change: +2.65 letters<br>At 24 months:<br>Mean injections in Year 2: 3.8<br>Mean visual acuity change: +1.43 letters                         |
| Giannakaki-Zimmerman et al.[88] | Retrospective observational study                              | AMD and CNV switch from PRN to treat-and-extend | Aflibercept | PRN                                       | 32 | -  | 12 months prior to crossover:<br>Mean injections: 6.0<br>Mean visual acuity change: -0.0 letters                                                                                                         |
|                                 |                                                                |                                                 |             | Treat-and-extend                          |    |    | At 12 months:<br>Mean injections: 7.5<br>Mean visual acuity change: -0.65 letters                                                                                                                        |
| Gupta et al.[89]                | Retrospective review of medical records                        | nAMD                                            | Ranibizumab | Treat-and-extend, following loading doses | 92 | 92 | At 12 months:<br>Mean injections: 8.4<br>Mean Snellen visual acuity: 20/77 (from 20/135 at baseline;p<0.001)<br><br>At 24 months:<br>Mean injections: 7.5<br>Mean Snellen visual acuity: 20/83 (p=0.002) |
| Hatz and Prünfte[90]            | Retrospective study consisting of two consecutive, comparative | nAMD                                            | Ranibizumab | PRN, following loading doses              | 70 | 70 | At 12 months:<br>Mean injections: 6.0<br>Mean visual acuity change: +0.07 letters                                                                                                                        |
|                                 |                                                                |                                                 |             | Treat-and-extend, following loading doses | 70 | 70 | At 12 months:<br>Mean injections: 8.6<br>Mean visual acuity change: +0.18 letters                                                                                                                        |

|                        | case series                             |                                                                                                      |                            |                                                                        |     |     |                                                                                                                                                                                |
|------------------------|-----------------------------------------|------------------------------------------------------------------------------------------------------|----------------------------|------------------------------------------------------------------------|-----|-----|--------------------------------------------------------------------------------------------------------------------------------------------------------------------------------|
| Ito et al.[91]         | Retrospective review of medical records | nAMD                                                                                                 | Aflibercept                | Treat-and-extend, following loading doses                              | –   | 61  | At 24 months:<br>Mean injections: 13.6<br>Mean visual acuity change: -0.13 logMAR                                                                                              |
| Makjevic and Benda[92] | Retrospective review of medical records | nAMD                                                                                                 | Ranibizumab or bevacizumab | Treat-and-extend, following loading doses                              | 101 | 101 | At 12 months:<br>Mean injections: 8.0<br>Mean visual acuity change: +6.8 letters                                                                                               |
|                        |                                         |                                                                                                      |                            |                                                                        |     |     | At 24 months:<br>Mean injections: 6.3<br>Mean visual acuity change: +5.9 letters                                                                                               |
|                        |                                         |                                                                                                      |                            |                                                                        |     |     | At 36 months:<br>Mean injections: 5.9<br>Mean visual acuity change: +4.0 letters                                                                                               |
|                        |                                         |                                                                                                      |                            |                                                                        |     |     | At 48 months:<br>Mean injections: 5.4<br>Mean visual acuity change: +0.9 letters                                                                                               |
|                        |                                         |                                                                                                      |                            |                                                                        |     |     | At 60 months:<br>Mean injections: 4.0<br>Mean visual acuity change: -1.9 letters                                                                                               |
| Jørstad et al.[93]     | Prospective observational study         | Exudative AMD and persistent macular fluid despite monthly treatment with ranibizumab or bevacizumab | Aflibercept                | Treat-and-extend, following loading doses until no signs of active AMD | 47  | 50  | At 12 months:<br>Mean injections: 9.2<br>Mean visual acuity change: -0.01 logMAR<br>At 24 months:<br>Mean injections: 8.0<br>Mean visual acuity change: +0.07 logMAR (p=0.005) |

|                       |                                         |                                            |                            |                                                                                  |     |     |                                                                                                                                                                                                                                                             |
|-----------------------|-----------------------------------------|--------------------------------------------|----------------------------|----------------------------------------------------------------------------------|-----|-----|-------------------------------------------------------------------------------------------------------------------------------------------------------------------------------------------------------------------------------------------------------------|
| Rahimy et al.[94]     | Retrospective observational case series | nAMD with initial vision better than 20/40 | Ranibizumab or bevacizumab | Treat-and-extend, following monthly dosing until no signs of CNV were detectable | 40  | 42  | At 12 months:<br>Mean injections: 7.8<br>Mean visual acuity change: +0.031 logMAR<br><br>At 24 months:<br>Mean injections: 6.1<br>Mean visual acuity change: +0.041 logMAR                                                                                  |
| Rayess et al.[95]     | Retrospective, consecutive case series  | nAMD                                       | Ranibizumab or bevacizumab | Treat-and-extend, following loading doses                                        | 189 | 212 | At 12 months:<br>Mean injections: 7.6<br>Mean visual acuity change: +11.6 letters<br>At 24 months:<br>Mean injections: 5.7<br>Mean visual acuity change: +10.7 letters<br>At 36 months:<br>Mean injections: 5.8<br>Mean visual acuity change: +13.6 letters |
| Vardarinos et al.[96] | Retrospective review of medical records | nAMD                                       | Ranibizumab                | Treat-and-extend, following loading doses                                        | 60  |     | At 12 months:<br>Mean injections: 7.8<br>Mean visual acuity change: +8.3 letters<br>At 24 months:<br>Mean injections: 12.1<br>Mean visual acuity change: +5.2 letters                                                                                       |
| Westborg et al.[46]   | Retrospective registry study            | nAMD                                       | Any anti-VEGF therapy      | Regimen not defined                                                              | –   | –   | At 84 months:<br>Mean injections: 3/year<br>Mean visual acuity change: -1.0 letters                                                                                                                                                                         |



|                      |                                         |               |                                |                                                    |    |     |                                                                                                                                                                    |
|----------------------|-----------------------------------------|---------------|--------------------------------|----------------------------------------------------|----|-----|--------------------------------------------------------------------------------------------------------------------------------------------------------------------|
| Yamamoto et al.[97]  | Retrospective review of medical records | nAMD          | Aflibercept                    | Treat-and-extend, following loading doses          | 67 | 67  | At 12 months:<br>Mean injections: 8.3<br>Mean visual acuity change: -0.15 logMAR (p<0.001)                                                                         |
| Engelbert et al.[98] | Retrospective case-control study        | Type 1 AMD    | Bevacizumab and/or ranibizumab | Modified treat-and-extend, following loading doses | 16 | 18  | At 24 months:<br>Mean injections: 12<br>Mean visual acuity change: -0.01 logMAR<br>At 36 months:<br>Mean injections: 20<br>Mean visual acuity change: -0.01 logMAR |
| Garweg et al.[99]    | Retrospective comparative case series   | Exudative AMD | Aflibercept                    | Treat-and-extend, following loading doses          | 99 | 106 | At 12 months:<br>Mean injections: 7.5<br>Mean visual acuity change: Stable<br>At 24 months:<br>Mean injections: 11.8<br>Mean visual acuity change: Stable          |
|                      |                                         |               | Ranibizumab                    |                                                    | 43 | 47  | At 12 months:<br>Mean injections: 6.9<br>Mean visual acuity change: Stable<br>At 24 months:<br>Mean injections: 10.3<br>Mean visual acuity change: Stable          |
| Rush et al.[100]     | Retrospective review of medical records | nAMD          | Bevacizumab                    | Treat-and-extend                                   | –  | 230 | At 12 months:<br>Mean injections: 9.2 injections<br>Mean visual acuity change: -0.09 logMAR (p<0.001)                                                              |

|                       |                                               |               |             |                                                                               |    |    |                                                                                                                                                                                   |
|-----------------------|-----------------------------------------------|---------------|-------------|-------------------------------------------------------------------------------|----|----|-----------------------------------------------------------------------------------------------------------------------------------------------------------------------------------|
| Sakamoto et al.[101]  | Prospective, interventional, open-label study | Exudative AMD | Aflibercept | Fixed (bimonthly), following loading dose<br><br>Treat-and-extend (in Year 2) | 47 | 47 | At 12 months:<br>Mean injections: 6.7<br>Mean visual acuity change: -0.04 logMAR (p<0.05)<br><br>At 24 months:<br>Mean injections: 4.8<br>Mean visual acuity change: -0.03 logMAR |
| Shienbaum et al.[102] | Retrospective review of medical records       | nAMD          | Bevacizumab | Treat-and-extend                                                              | 73 | 74 | At 12 months:<br>Mean injections: 7.9<br>Mean Snellen visual acuity: 20/109 (20/230 at baseline; p<0.05)                                                                          |

AMD, age-related macular degeneration; BCVA, best corrected visual acuity; CNV, choroidal neovascularisation; logMAR, log of the Minimum Angle of Resolution; nAMD, neovascular AMD; PRN, pro re nata; VEGF, vascular endothelial growth factor.

\*All visual acuity changes are relative to baseline.

## References

1. Fung AE, Lalwani GA, Rosenfeld PJ, et al. An optical coherence tomography-guided, variable dosing regimen with intravitreal ranibizumab (Lucentis) for neovascular age-related macular degeneration. *Am J Ophthalmol* 2007;143:566-83 doi: 10.1016/j.ajo.2007.01.028.
2. Martin DF, Maguire MG, Ying GS, et al. Ranibizumab and bevacizumab for neovascular age-related macular degeneration. *N Engl J Med* 2011;364:1897-908 doi: 10.1056/NEJMoa1102673 [published Online First: 28 April 2011].
3. Silva R, Axer-Siegel R, Eldem B, et al. The SECURE study: long-term safety of ranibizumab 0.5 mg in neovascular age-related macular degeneration. *Ophthalmology* 2013;120:130-9 doi: 10.1016/j.ophtha.2012.07.026 [published Online First: 25 September 2012].
4. Singer MA, Awh CC, Sadda S, et al. HORIZON: an open-label extension trial of ranibizumab for choroidal neovascularization secondary to age-related macular degeneration. *Ophthalmology* 2012;119:1175-83 doi: 10.1016/j.ophtha.2011.12.016 [published Online First: 04 February 2012].
5. Souied E, Oubraham H, Mimoun G, et al. Changes in visual acuity in patients with wet age-related macular degeneration treated with intravitreal ranibizumab in daily clinical practice: The TWIN Study. *Retina* 2015;35:1743-9 doi: 10.1097/iae.0000000000000548 [published Online First: 23 April 2015].
6. Holz FG, Tadayoni R, Beatty S, et al. Multi-country real-life experience of anti-vascular endothelial growth factor therapy for wet age-related macular degeneration. *Br J Ophthalmol* 2015;99:220-6 doi: 10.1136/bjophthalmol-2014-305327 [published Online First: 07 September 2014].
7. Holz FG. Effectiveness of ranibizumab for the treatment of neovascular age-related macular degeneration: Twelve-month results from the final analysis of the real-world LUMINOUS study *EURETINA* 2017.
8. Souied E, Clemens A, Macfadden W. Ranibizumab in patients with neovascular age-related macular degeneration: results from the real-world LUMINOUS™ study [abstract]. *Acta Ophthalmol* 2017 doi: 10.1111/j.1755-3768.2017.01111.
9. Rao P, Lum F, Wood K, et al. Real-World Vision in Age-Related Macular Degeneration Patients Treated with Single Anti-VEGF Drug Type for 1 Year in the IRIS Registry. *Ophthalmology* 2018;125:522-28 doi: 10.1016/j.ophtha.2017.10.010 [published Online First: 13 November 2017].
10. Talks JS, Lotery AJ, Ghanchi F, et al. First-Year Visual Acuity Outcomes of Providing Aflibercept According to the VIEW Study Protocol for Age-Related Macular Degeneration. *Ophthalmology* 2016;123:337-43 doi: 10.1016/j.ophtha.2015.09.039 [published Online First: 12 November 2015].
11. Framme C. Impact of treatment interval in naïve nAMD patients: 12-month results of the PERSEUS and RAINBOW studies *EURETINA* 2017.
12. Lee AY, Lee CS, Egan CA, et al. UK AMD/DR EMR REPORT IX: comparative effectiveness of predominantly as needed (PRN) ranibizumab versus continuous aflibercept in UK clinical practice. *Br J Ophthalmol* 2017;101:1683-88 doi: 10.1136/bjophthalmol-2016-309818 [published Online First: 06 May 2017].

13. Airoyd A, Venugopal D, Allgar V, et al. Clinical characteristics and outcomes after 5 years pro re nata treatment of neovascular age-related macular degeneration with ranibizumab. *Acta Ophthalmol* 2015;93:e511-2 doi: 10.1111/aos.12618 [published Online First: 10 December 2014].
14. Almuhtaseb H, Kanavati S, Rufai SR, et al. One-year real-world outcomes in patients receiving fixed-dosing aflibercept for neovascular age-related macular degeneration. *Eye (Lond)* 2017;31:878-83 doi: 10.1038/eye.2017.6 [published Online First: 12 February 2017].
15. Almuhtaseb H, Johnston RL, Talks JS, et al. Second-year visual acuity outcomes of nAMD patients treated with aflibercept: data analysis from the UK Aflibercept Users Group. *Eye (Lond)* 2017;31:1582-88 doi: 10.1038/eye.2017.108 [published Online First: 18 June 2017].
16. Arias L, Roman I, Masuet-Aumatell C, et al. One-year results of a flexible regimen with ranibizumab therapy in macular degeneration: relationship with the number of injections. *Retina* 2011;31:1261-7 doi: 10.1097/IAE.0b013e318207d152 [published Online First: 19 April 2011].
17. Barthelmes D, Campain A, Nguyen P, et al. Effects of switching from ranibizumab to aflibercept in eyes with exudative age-related macular degeneration. *Br J Ophthalmol* 2016;100:1640-45 doi: 10.1136/bjophthalmol-2015-308090 [published Online First: 20 March 2016].
18. Berg K, Roald AB, Navaratnam J, et al. An 8-year follow-up of anti-vascular endothelial growth factor treatment with a treat-and-extend modality for neovascular age-related macular degeneration. *Acta Ophthalmol* 2017;95:796-802 doi: 10.1111/aos.13522 [published Online First: 20 September 2017].
19. Biarnes M, Mones J, Villalbi JR, et al. As-needed treatment with ranibizumab 0.5 mg in patients with neovascular age-related macular degeneration. *Eur J Ophthalmol* 2011;21:282-9 doi: 10.5301/ejo.2010.5766 [published Online First: 05 October 2010].
20. Bohni SC, Bittner M, Howell JP, et al. Comparison of Eylea(R) with Lucentis(R) as first-line therapy in patients with treatment-naive neovascular age-related macular degeneration in real-life clinical practice: retrospective case-series analysis. *BMC Ophthalmol* 2015;15:109 doi: 10.1186/s12886-015-0101-4 [published Online First: 21 August 2015].
21. Braimah IZ, Agarwal K, Mansour A, et al. One-year outcome of intravitreal ziv-aflibercept therapy for non-responsive neovascular age-related macular degeneration. *Br J Ophthalmol* 2018;102:91-96 doi: 10.1136/bjophthalmol-2017-310318 [published Online First: 10 June 2017].
22. Eldem B, Lai TYY, Ngah NF, et al. An analysis of ranibizumab treatment and visual outcomes in real-world settings: the UNCOVER study. *Graefes Arch Clin Exp Ophthalmol* 2018;256:963-73 doi: 10.1007/s00417-017-3890-8 [published Online First: 05 March 2018].
23. Elwes F, Borooah S, Aspinall P, et al. Clinical outcomes of switching to aflibercept using a pro re nata treatment regimen in patients with neovascular age-related macular degeneration who incompletely responded to ranibizumab. *BMC Ophthalmol* 2018;18:20 doi: 10.1186/s12886-018-0688-3 [published Online First: 31 January 2018].
24. Finger RP, Wiedemann P, Blumhagen F, et al. Treatment patterns, visual acuity and quality-of-life outcomes of the WAVE study - a noninterventional study of ranibizumab treatment for neovascular age-related macular degeneration in Germany. *Acta Ophthalmol* 2013;91:540-6 doi: 10.1111/j.1755-3768.2012.02493.x [published Online First: 23 November 2012].

25. Gabai A, Veritti D, Lanzetta P. One-year outcome of ranibizumab for neovascular age-related macular degeneration: a thorough analysis in a real-world clinical setting. *Eur J Ophthalmol* 2014;24:396-401 doi: 10.5301/ejo.5000385 [published Online First: 19 November 2013].
26. Garweg JG, Zirpel JJ, Gerhardt C, et al. The fate of eyes with wet AMD beyond four years of anti-VEGF therapy. *Graefes Arch Clin Exp Ophthalmol* 2018;256:823-31 doi: 10.1007/s00417-018-3907-y [published Online First: 06 February 2018].
27. Gerding H, Loukopoulos V, Riese J, et al. Results of flexible ranibizumab treatment in age-related macular degeneration and search for parameters with impact on outcome. *Graefes Arch Clin Exp Ophthalmol* 2011;249:653-62 doi: 10.1007/s00417-011-1636-6 [published Online First: 10 March 2011].
28. Giacomelli G, Giansanti F, Finocchio L, et al. Results of intravitreal ranibizumab with a prn regimen in the treatment of extrafoveal and juxtafoveal neovascular membranes in age-related macular degeneration. *Retina* 2014;34:860-7 doi: 10.1097/iae.000000000000007 [published Online First: 24 April 2014].
29. Gianniou C, Dirani A, Ferrini W, et al. Two-year outcome of an observe-and-plan regimen for neovascular age-related macular degeneration: how to alleviate the clinical burden with maintained functional results. *Eye (Lond)* 2015;29:342-9 doi: 10.1038/eye.2014.258 [published Online First: 02 November 2014].
30. Gillies MC, Nguyen V, Daien V, et al. Twelve-Month Outcomes of Ranibizumab vs. Aflibercept for Neovascular Age-Related Macular Degeneration: Data from an Observational Study. *Ophthalmology* 2016;123:2545-53 doi: 10.1016/j.ophtha.2016.08.016 [published Online First: 07 October 2016].
31. Heimes B, Lommatzsch A, Zeimer M, et al. Long-term visual course after anti-VEGF therapy for exudative AMD in clinical practice evaluation of the German reinjection scheme. *Graefes Arch Clin Exp Ophthalmol* 2011;249:639-44 doi: 10.1007/s00417-010-1524-5 [published Online First: 05 October 2010].
32. Kang S, Roh YJ. Ranibizumab treatment administered as needed for occult and minimally classic neovascular membranes in age-related macular degeneration. *Jpn J Ophthalmol* 2011;55:123-7 doi: 10.1007/s10384-010-0910-1 [published Online First: 15 March 2011].
33. Lala C, Framme C, Wolf-Schnurrbusch UE, et al. Three-year results of visual outcome with disease activity-guided ranibizumab algorithm for the treatment of exudative age-related macular degeneration. *Acta Ophthalmol* 2013;91:526-30 doi: 10.1111/j.1755-3768.2012.02457.x [published Online First: 16 June 2012].
34. Liew G, Lee AY, Zarranz-Ventura J, et al. The UK Neovascular AMD Database Report 3: inter-centre variation in visual acuity outcomes and establishing real-world measures of care. *Eye (Lond)* 2016;30:1462-68 doi: 10.1038/eye.2016.149 [published Online First: 16 July 2016].
35. Lotery A, Griner R, Ferreira A, et al. Real-world visual acuity outcomes between ranibizumab and aflibercept in treatment of neovascular AMD in a large US data set. *Eye (Lond)* 2017;31:1697-706 doi: 10.1038/eye.2017.143 [published Online First: 22 July 2017].
36. Marques IP, Fonseca P, Luz Cachulo M, et al. Treatment of exudative age-related macular degeneration with intravitreal ranibizumab in clinical practice: a 3-year follow-up. *Ophthalmologica* 2013;229:158-67 doi: 10.1159/000343709 [published Online First: 15 March 2013].

37. Muftuoglu IK, Tsai FF, Gaber R, et al. High-frequency aflibercept injections in persistent neovascular age-related macular degeneration. *Graefes Arch Clin Exp Ophthalmol* 2017;255:709-17 doi: 10.1007/s00417-016-3547-z [published Online First: 24 November 2016].
38. Muniraju R, Ramu J, Sivaprasad S. Three-year visual outcome and injection frequency of intravitreal ranibizumab therapy for neovascular age-related macular degeneration. *Ophthalmologica* 2013;230:27-33 doi: 10.1159/000350238 [published Online First: 03 May 2013].
39. Ozkaya A, Alkin Z, Togac M, et al. Five-year outcomes of ranibizumab in neovascular age-related macular degeneration: Real life clinical experience. *Korean J Ophthalmol* 2017;31:424-30 doi: 10.3341/kjo.2016.0125 [published Online First: 11 September 2017].
40. Parvin P, Zola M, Dirani A, et al. Two-year outcome of an observe-and-plan regimen for neovascular age-related macular degeneration treated with Aflibercept. *Graefes Arch Clin Exp Ophthalmol* 2017;255:2127-34 doi: 10.1007/s00417-017-3762-2 [published Online First: 12 August 2017].
41. Peden MC, Suner IJ, Hammer ME, et al. Long-term outcomes in eyes receiving fixed-interval dosing of anti-vascular endothelial growth factor agents for wet age-related macular degeneration. *Ophthalmology* 2015;122:803-8 doi: 10.1016/j.ophtha.2014.11.018 [published Online First: 19 January 2015].
42. Rasmussen A, Sander B, Larsen M, et al. Neovascular age-related macular degeneration treated with ranibizumab or aflibercept in the same large clinical setting: visual outcome and number of injections. *Acta Ophthalmol* 2017;95:128-32 doi: 10.1111/aos.13233 [published Online First: 19 August 2016].
43. Rasmussen A, Bloch SB, Fuchs J, et al. A 4-year longitudinal study of 555 patients treated with ranibizumab for neovascular age-related macular degeneration. *Ophthalmology* 2013;120:2630-6 doi: 10.1016/j.ophtha.2013.05.018 [published Online First: 09 July 2013].
44. Ricci F, Parravano M, Regine F, et al. Aflibercept in persistent neovascular AMD: comparison of different treatment strategies in switching therapy. *Eye (Lond)* 2016;30:1077-83 doi: 10.1038/eye.2016.95 [published Online First: 28 May 2016].
45. Saleh M, Kheliouen M, Tebeanu E, et al. Retreatment by series of three intravitreal injections of ranibizumab in neovascular age-related macular degeneration: long-term outcomes. *Graefes Arch Clin Exp Ophthalmol* 2013;251:1901-7 doi: 10.1007/s00417-013-2284-9 [published Online First: 23 February 2013].
46. Westborg I, Granstam E, Rosso A, et al. Treatment for neovascular age-related macular degeneration in Sweden: outcomes at seven years in the Swedish Macula Register. *Acta Ophthalmol* 2017;95:787-95 doi: 10.1111/aos.13539 [published Online First: 24 August 2017].
47. Arevalo JF, Fromow-Guerra J, Sanchez JG, et al. Primary intravitreal bevacizumab for subfoveal choroidal neovascularization in age-related macular degeneration: results of the Pan-American Collaborative Retina Study Group at 12 months follow-up. *Retina* 2008;28:1387-94 doi: 10.1097/IAE.0b013e3181884ff4 [published Online First: 12 October 2008].
48. Arevalo JF, Lasave AF, Wu L, et al. Intravitreal bevacizumab for choroidal neovascularization in age-related macular degeneration: 5-Year results of The Pan-American Collaborative Retina Study Group. *Retina* 2016;36:859-67 doi: 10.1097/iae.0000000000000827 [published Online First: 04 November 2015].

49. Axer-Siegel R, Bor E, Bourla DH, et al. Intravitreal bevacizumab treatment for exudative age-related macular degeneration with good visual acuity. *Retina* 2012;32:1811-20 doi: 10.1097/IAE.0b013e31825db771 [published Online First: 25 July 2012].
50. Bashshur ZF, Haddad ZA, Schakal AR, et al. Intravitreal bevacizumab for treatment of neovascular age-related macular degeneration: the second year of a prospective study. *Am J Ophthalmol* 2009;148:59-65 e1 doi: 10.1016/j.ajo.2009.02.006 [published Online First: 21 April 2009].
51. Bashshur ZF, Haddad ZA, Schakal A, et al. Intravitreal bevacizumab for treatment of neovascular age-related macular degeneration: a one-year prospective study. *Am J Ophthalmol* 2008;145:249-56 doi: 10.1016/j.ajo.2007.09.031 [published Online First: 11 December 2007].
52. Bellerive C, Cinq-Mars B, Lalonde G, et al. Bevacizumab and ranibizumab for neovascular age-related macular degeneration: a treatment approach based on individual patient needs. *Can J Ophthalmol* 2012;47:165-9 doi: 10.1016/j.jcjo.2012.01.011 [published Online First: 09 May 2012].
53. Beykin G, Grunin M, Averbukh E, et al. Bevacizumab treatment for neovascular age-related macular degeneration in the setting of a clinic: "real life" long-term outcome. *BMC Ophthalmol* 2015;15:39 doi: 10.1186/s12886-015-0019-x [published Online First: 17 April 2015].
54. Calvo P, Abadia B, Ferreras A, et al. Long-term visual outcome in wet age-related macular degeneration patients depending on the number of ranibizumab injections. *Journal of ophthalmology* 2015;2015:820605 doi: 10.1155/2015/820605 [published Online First: 23 October 2015].
55. Chang YS, Han JI, Yoo SJ, et al. Intravitreal anti-vascular endothelial growth factor for typical exudative age-related macular degeneration in eyes with good baseline visual acuity. *Korean J Ophthalmol* 2014;28:466-72 doi: 10.3341/kjo.2014.28.6.466 [published Online First: 02 December 2014].
56. Cohen SY, Mimoun G, Oubraham H, et al. Changes in visual acuity in patients with wet age-related macular degeneration treated with intravitreal ranibizumab in daily clinical practice: the LUMIERE study. *Retina* 2013;33:474-81 doi: 10.1097/IAE.0b013e31827b6324.
57. De Bats F, Grange JD, Cornut PL, et al. Bevacizumab versus ranibizumab in the treatment of exudative age-related macular degeneration: a retrospective study of 58 patients. *J Fr Ophthalmol* 2012;35:661-6 doi: 10.1016/j.jfo.2012.01.015 [published Online First: 09 November 2012].
58. Eleftheriadou M, Gemenetzi M, Lukic M, et al. Three-Year Outcomes of Aflibercept Treatment for Neovascular Age-Related Macular Degeneration: Evidence from a Clinical Setting. *Ophthalmol Ther* 2018;7:361-68 doi: 10.1007/s40123-018-0139-5 [published Online First: 10 July 2018].
59. Gupta B, Adewoyin T, Patel SK, et al. Comparison of two intravitreal ranibizumab treatment schedules for neovascular age-related macular degeneration. *Br J Ophthalmol* 2011;95:386-90 doi: 10.1136/bjo.2010.179499 [published Online First: 10 August 2010].
60. Hjelmqvist L, Lindberg C, Kanulf P, et al. One-year outcomes using ranibizumab for neovascular age-related macular degeneration: results of a prospective and retrospective observational multicentre study. *Journal of ophthalmology* 2011;2011:405724 doi: 10.1155/2011/405724 [published Online First: 17 December 2011].

61. Jacob J, Brie H, Leys A, et al. Six-year outcomes in neovascular age-related macular degeneration with ranibizumab. *Int J Ophthalmol* 2017;10:81-90 doi: 10.18240/ijo.2017.01.14 [published Online First: 06 February 2017].
62. Kruger Falk M, Kemp H, Sorensen TL. Four-year treatment results of neovascular age-related macular degeneration with ranibizumab and causes for discontinuation of treatment. *Am J Ophthalmol* 2013;155:89-95.e3 doi: 10.1016/j.ajo.2012.06.031 [published Online First: 02 October 2012].
63. Lalwani GA, Rosenfeld PJ, Fung AE, et al. A variable-dosing regimen with intravitreal ranibizumab for neovascular age-related macular degeneration: year 2 of the PRONTO Study. *Am J Ophthalmol* 2009;148:43-58.e1 doi: 10.1016/j.ajo.2009.01.024 [published Online First: 21 April 2009].
64. Mantel I, Niderprim SA, Gianniou C, et al. Reducing the clinical burden of ranibizumab treatment for neovascular age-related macular degeneration using an individually planned regimen. *Br J Ophthalmol* 2014;98:1192-6 doi: 10.1136/bjophthalmol-2013-304556 [published Online First: 15 April 2014].
65. Mekjavic PJ, Kraut A, Urbancic M, et al. Efficacy of 12-month treatment of neovascular age-related macular degeneration with intravitreal bevacizumab based on individually determined injection strategies after three consecutive monthly injections. *Acta Ophthalmol* 2011;89:647-53 doi: 10.1111/j.1755-3768.2009.01740.x [published Online First: 29 October 2009].
66. Messenger WB, Campbell JP, Faridi A, et al. Injection frequency and anatomic outcomes 1 year following conversion to aflibercept in patients with neovascular age-related macular degeneration. *Br J Ophthalmol* 2014;98:1205-7 doi: 10.1136/bjophthalmol-2013-304829 [published Online First: 06 May 2014].
67. Muether PS, Hoerster R, Hermann MM, et al. Long-term effects of ranibizumab treatment delay in neovascular age-related macular degeneration. *Graefes Arch Clin Exp Ophthalmol* 2013;251:453-8 doi: 10.1007/s00417-012-2038-0 [published Online First: 11 May 2012].
68. Ohnaka M, Nagai Y, Sho K, et al. A modified treat-and-extend regimen of aflibercept for treatment-naive patients with neovascular age-related macular degeneration. *Graefes Arch Clin Exp Ophthalmol* 2017;255:657-64 doi: 10.1007/s00417-016-3507-7 [published Online First: 16 October 2016].
69. Rakic JM, Leys A, Brie H, et al. Real-world variability in ranibizumab treatment and associated clinical, quality of life, and safety outcomes over 24 months in patients with neovascular age-related macular degeneration: the HELIOS study. *Clin Ophthalmol* 2013;7:1849-58 doi: 10.2147/opth.S49385 [published Online First: 05 October 2013].
70. van Asten F, Evers-Birkenkamp KU, van Lith-Verhoeven JJ, et al. A prospective, observational, open-label, multicentre study to investigate the daily treatment practice of ranibizumab in patients with neovascular age-related macular degeneration. *Acta Ophthalmol* 2015;93:126-33 doi: 10.1111/aos.12610 [published Online First: 10 December 2014].
71. Suzuki M, Gomi F, Sawa M, et al. Bevacizumab treatment for choroidal neovascularization due to age-related macular degeneration in Japanese patients. *Jpn J Ophthalmol* 2010;54:124-8 doi: 10.1007/s10384-009-0775-3 [published Online First: 20 April 2010].
72. Warwick AN, Leaver HH, Lotery AJ, et al. Fixed bimonthly aflibercept in naive and switched neovascular age-related macular degeneration patients: one year outcomes. *Int J Ophthalmol* 2016;9:1156-62 doi: 10.18240/ijo.2016.08.12 [published Online First: 03 September 2016].



73. Faure C, Cohen SY, Coscas F, et al. Real-world effectiveness and safety of intravitreal aflibercept regimens in patients with wet age-related macular degeneration: Updated 12-month outcomes of RAINBOW. *9th Congress on Controversies in Ophthalmology: Europe* 2018.
74. Lovestam Adrian M, Vassilev ZP, Westborg I. Baseline visual acuity as a prognostic factor for visual outcomes in patients treated with aflibercept for wet age-related macular degeneration: data from the INSIGHT study using the Swedish Macula Register. *Acta Ophthalmol* 2018 doi: 10.1111/aos.13864 [published Online First: 22 September 2018].
75. Barakat A, Rufin V, Tran THC. Two year outcome in treatment-naive patients with neovascular age-related macular degeneration (nAMD) using an individualized regimen of Aflibercept. *J Fr Ophthalmol* 2018;41:603-10 doi: 10.1016/j.jfo.2018.01.005 [published Online First: 01 September 2018].
76. Ono A, Shiragami C, Manabe S, et al. One-year outcomes of fixed treatment of intravitreal aflibercept for exudative age-related macular degeneration and the factor of visual prognosis. *Medicine (Baltimore)* 2018;97:e11737 doi: 10.1097/md.00000000000011737 [published Online First: 05 August 2018].
77. Chatziralli I, Regan SO, Mohamed R, et al. Intravitreal aflibercept for neovascular age-related macular degeneration in patients aged 90 years or older: 2-year visual acuity outcomes. *Eye (Lond)* 2018;32:1523-29 doi: 10.1038/s41433-018-0114-3 [published Online First: 06 August 2018].
78. Brand C, Arnoldussen M. IRay therapy as an adjuvant therapy in newly diagnosed patients with neovascular age-related macular degeneration. *Eye (Lond)* 2018;32:1345-52 doi: 10.1038/s41433-018-0080-9 [published Online First: 18 April 2018].
79. Oubraham H, Cohen SY, Samimi S, et al. Inject and extend dosing versus dosing as needed: a comparative retrospective study of ranibizumab in exudative age-related macular degeneration. *Retina* 2011;31:26-30 doi: 10.1097/IAE.0b013e3181de5609.
80. Hatz K, Prunte C. Changing from a pro re nata treatment regimen to a treat and extend regimen with ranibizumab in neovascular age-related macular degeneration. *Br J Ophthalmol* 2016;100:1341-5 doi: 10.1136/bjophthalmol-2015-307299 [published Online First: 11 January 2016].
81. Arnold JJ, Campain A, Barthelmes D, et al. Two-year outcomes of "treat and extend" intravitreal therapy for neovascular age-related macular degeneration. *Ophthalmology* 2015;122:1212-9 doi: 10.1016/j.ophtha.2015.02.009 [published Online First: 04 April 2015].
82. Barthelmes D, Nguyen V, Daien V, et al. Two Year Outcomes of "Treat and Extend" Intravitreal Therapy Using Aflibercept Preferentially for Neovascular Age-Related Macular Degeneration. *Retina* 2018;38:20-28 doi: 10.1097/IAE.0000000000001496.
83. Abedi F, Wickremasinghe S, Islam AF, et al. Anti-VEGF treatment in neovascular age-related macular degeneration: a treat-and-extend protocol over 2 years. *Retina* 2014;34:1531-8 doi: 10.1097/iae.000000000000134 [published Online First: 19 March 2014].
84. Castro-Navarro V, Cervera-Taulet E, Montero-Hernandez J, et al. Treat-and-extend approach with aflibercept: Effects on different subtypes of age-related choroidal neovascularisation. *Arch Soc Esp Oftalmol* 2017;92:112-19 doi: 10.1016/j.oftal.2016.09.005 [published Online First: 07 November 2016].

85. Castro-Navarro V, Cervera-Taulet E, Montero-Hernandez J, et al. One-Year Outcomes of the Treat-and-Extend Approach with Aflibercept in Age-Related Macular Degeneration: Effects on Typical Choroidal Neovascularization and Retinal Angiomatic Proliferation. *Ophthalmologica* 2016;236:215-22 doi: 10.1159/000453281 [published Online First: 12 December 2016].
86. Chen YN, Powell AM, Mao A, et al. Retrospective review of Lucentis "treat and extend" patterns and outcomes in age-related macular degeneration. *Retina* 2016;36:272-8 doi: 10.1097/iae.0000000000000691 [published Online First: 23 July 2015].
87. Garweg JG, Niderprim SA, Russ HM, et al. Comparison of strategies of treatment with ranibizumab in newly-diagnosed cases of neovascular age-related macular degeneration. *J Ocul Pharmacol Ther* 2017;33:773-78 doi: 10.1089/jop.2017.0006 [published Online First: 28 September 2017].
88. Giannakaki-Zimmermann H, Ebnetter A, Munk MR, et al. Outcomes when Switching from a pro re nata Regimen to a Treat and Extend Regimen Using Aflibercept in Neovascular Age-Related Macular Degeneration. *Ophthalmologica* 2016;236:201-06 doi: 10.1159/000452929 [published Online First: 03 December 2016].
89. Gupta OP, Shienbaum G, Patel AH, et al. A treat and extend regimen using ranibizumab for neovascular age-related macular degeneration clinical and economic impact. *Ophthalmology* 2010;117:2134-40 doi: 10.1016/j.ophtha.2010.02.032 [published Online First: 02 July 2010].
90. Hatz K, Prunte C. Treat and extend versus pro re nata regimens of ranibizumab in neovascular age-related macular degeneration: a comparative 12 Month study. *Acta Ophthalmol* 2017;95:e67-e72 doi: 10.1111/aos.13031 [published Online First: 25 March 2016].
91. Ito A, Matsumoto H, Morimoto M, et al. Two-year outcomes of a treat-and-extend regimen using intravitreal aflibercept injections for typical age-related macular degeneration. *Ophthalmologica* 2017;238:236-42 doi: 10.1159/000479937 [published Online First: 03 September 2017].
92. Mekjavic PJ, Zaletel Benda P. Outcome of 5-year treatment of neovascular age-related macular degeneration with intravitreal anti-VEGF using "treat and extend" regimen. *Front Med (Lausanne)* 2018;5:125 doi: 10.3389/fmed.2018.00125 [published Online First: 17 May 2018].
93. Jorstad OK, Faber RT, Moe MC. Two-year functional and anatomical results after converting treatment resistant eyes with exudative age-related macular degeneration to aflibercept in accordance with a treat and extend protocol. *Acta Ophthalmol* 2017;95:460-63 doi: 10.1111/aos.13480 [published Online First: 31 May 2017].
94. Rahimy E, Rayess N, Ho AC, et al. Treatment outcomes for neovascular age-related macular degeneration patients with initial vision better than 20/40 using a treat-and-extend regimen. *Retina* 2016;36:875-80 doi: 10.1097/iae.0000000000000814 [published Online First: 03 December 2015].
95. Rayess N, Houston SK, 3rd, Gupta OP, et al. Treatment outcomes after 3 years in neovascular age-related macular degeneration using a treat-and-extend regimen. *Am J Ophthalmol* 2015;159:3-8.e1 doi: 10.1016/j.ajo.2014.09.011 [published Online First: 15 September 2014].
96. Vardarinos A, Gupta N, Janjua R, et al. 24-month clinical outcomes of a treat-and-extend regimen with ranibizumab for wet age-related macular degeneration in a real life setting. *BMC Ophthalmol* 2017;17:58 doi: 10.1186/s12886-017-0451-1 [published Online First: 30 April 2017].

97. Yamamoto A, Okada AA, Nakayama M, et al. One-year outcomes of a treat-and-extend regimen of aflibercept for exudative age-related macular degeneration. *Ophthalmologica* 2017;237:139-44 doi: 10.1159/000458538 [published Online First: 06 March 2017].
98. Engelbert M, Zweifel SA, Freund KB. Long-term follow-up for type 1 (subretinal pigment epithelium) neovascularization using a modified "treat and extend" dosing regimen of intravitreal anti-vascular endothelial growth factor therapy. *Retina* 2010;30:1368-75 doi: 10.1097/IAE.0b013e3181d50cbf [published Online First: 03 June 2010].
99. Garweg JG, Gerhardt C, Kodjikian L, et al. Real-life experience with aflibercept and ranibizumab in the treatment of newly diagnosed neovascular age-related macular degeneration over 24 months. *J Ocul Pharmacol Ther* 2017;33:567-72 doi: 10.1089/jop.2017.0031 [published Online First: 31 May 2017].
100. Rush RB, Simunovic MP, Vandiver L, et al. Treat-and-extend bevacizumab for neovascular age-related macular degeneration: the importance of baseline characteristics. *Retina* 2014;34:846-52 doi: 10.1097/iae.000000000000033 [published Online First: 19 November 2013].
101. Sakamoto S, Takahashi H, Inoue Y, et al. Intravitreal aflibercept for exudative age-related macular degeneration with good visual acuity: 2-year results of a prospective study. *Clin Ophthalmol* 2018;12:1137-47 doi: 10.2147/opth.S160961 [published Online First: 05 July 2018].
102. Shienbaum G, Gupta OP, Fecarotta C, et al. Bevacizumab for neovascular age-related macular degeneration using a treat-and-extend regimen: clinical and economic impact. *Am J Ophthalmol* 2012;153:468-73.e1 doi: 10.1016/j.ajo.2011.08.011 [published Online First: 15 October 2011].
